# Supplementary material for: The IDA-LIKE peptides IDL6 and IDL7 are negative modulators of stress responses in Arabidopsis thaliana
Source: PubMed Central journal article supplement (PMC5853212; doi:10.1093/jxb/erx168), 2017-06-06
Supplement: erx168_suppl_supplementary_figuress1-s9_tables1.pdf [file erx168_suppl_supplementary_figuress1-s9_tables1.pdf]

# Supplementary Figure S1

**A**

1 MAINRSLLLI LLFISVSLST ARILPGEFVP VIFSGEIPPV SKSAVVGCGG  
51 EQETKTEYSS FVPEVVAGRF GSLVLNALPK GSRPGSGPSK KTN<sup>D</sup>VKT

**B**

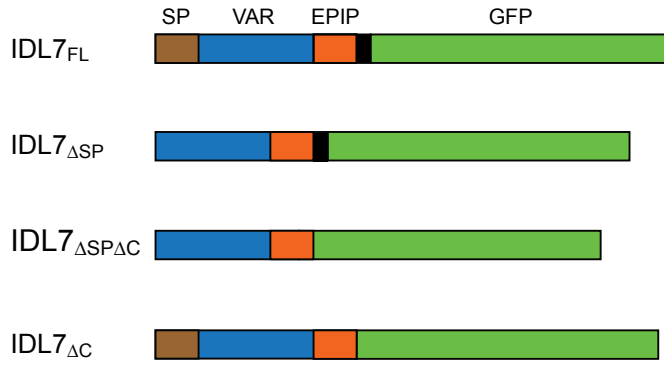

Supplementary Figure S1.

Overview of the construct used for localisation studies. (A) Protein sequence of *A. thaliana* IDL7. Green letters; signal peptide (SP), blue letters; variable region (VAR), orange letters; peptide motif (EPIP/SGPS), black letters; C-terminal. (B) Schematic presentation of IDL7-GFP fusions used in localisation studies. Colouring is the same as in (A).

# Supplementary Figure S2

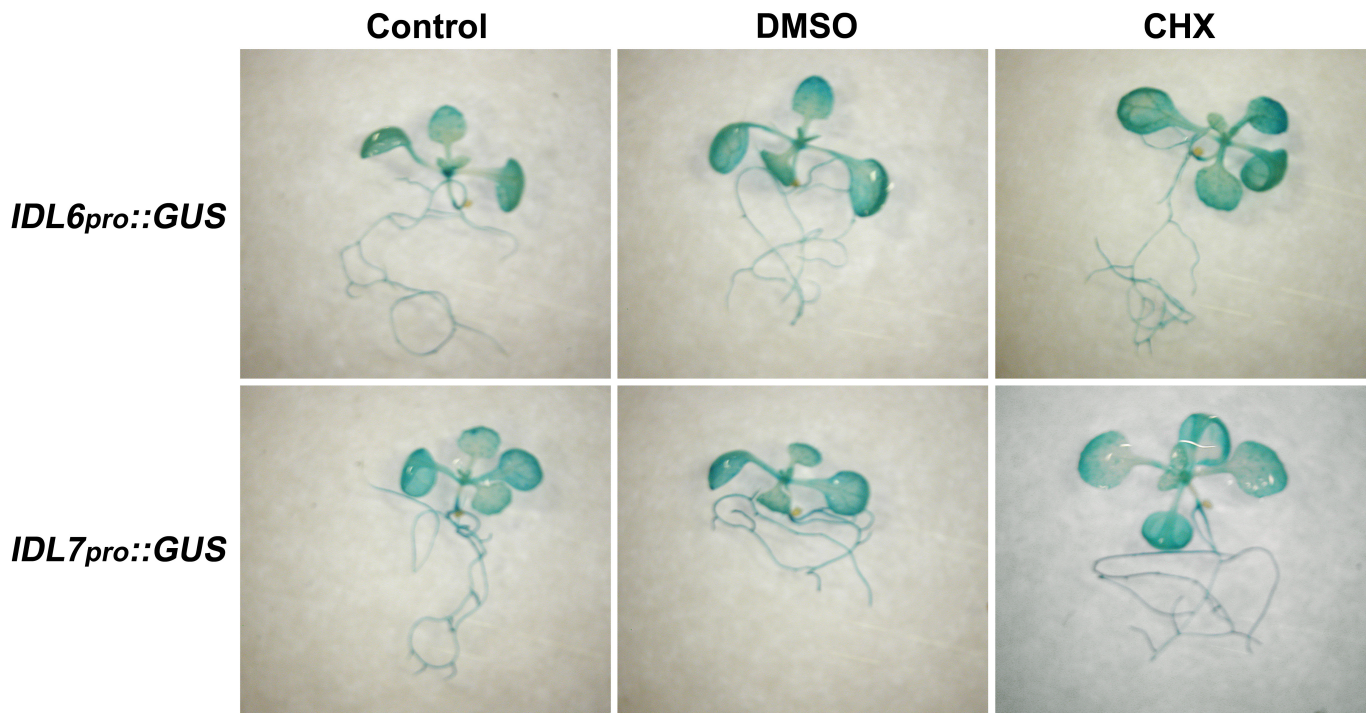

Supplementary Figure S2.

Distribution of *GUS* mRNA directed by the *IDL6* and *IDL7* promoters in ten days-old seedlings. Untreated plants (Control), plants treated with mock solution (0.1% DMSO, 3 hours), and plants treated with CHX (10  $\mu$ g/ml, 3 hours).

# Supplementary Figure S3

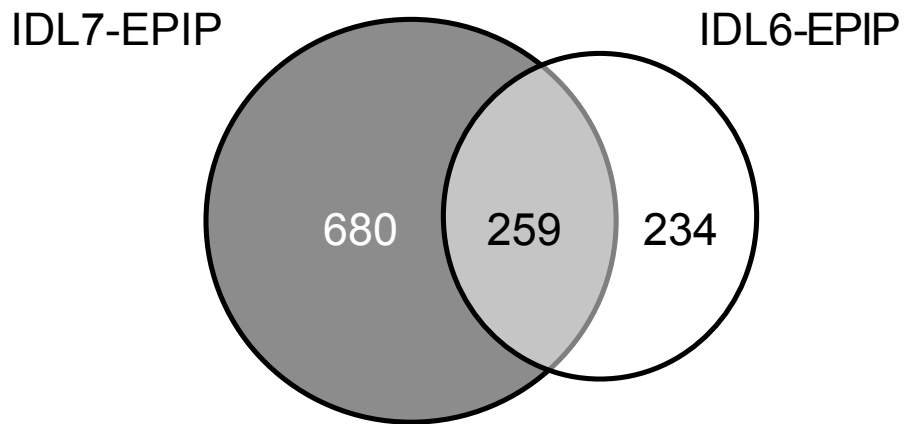

Supplementary Figure S3.

Venn diagram of IDL6- and IDL7-responsive genes. Genes significantly regulated by IDL6-EPIP ( $p < 0.1$ ) or IDL7-EPIP ( $p < 0.05$ ) peptide treatment were compared. Numbers indicate genes that have shared or unique regulation between the two datasets.

# Supplementary Figure S4

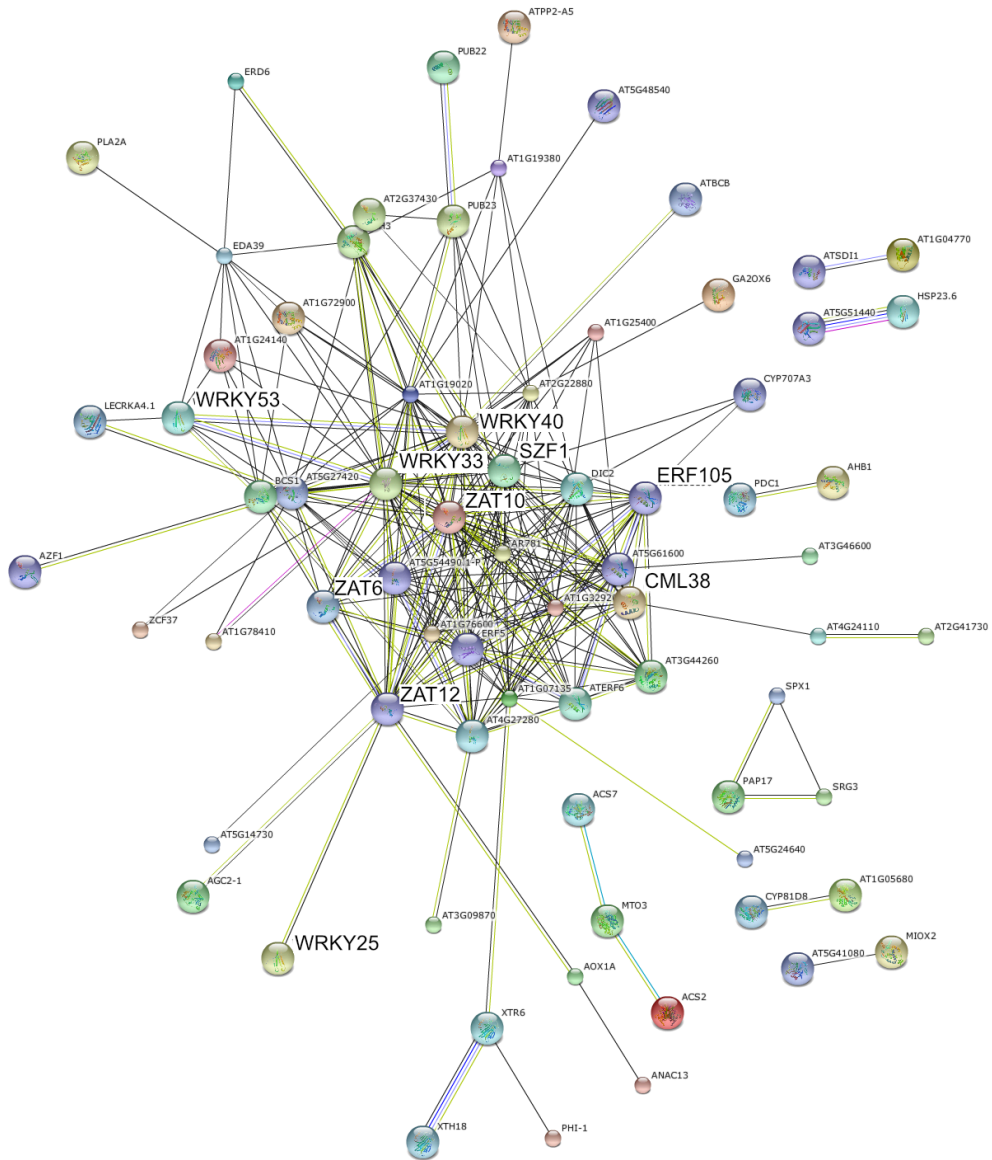

Supplementary Figure S4.

Network analysis of genes down-regulated by IDL7 peptide treatment. The web-based tool STRING (Szklarczyk *et al.*, 2015) was used on a filtered dataset ( $\log_2 < -1$ ; confidence level 0.700). The STRING database assembles information about co-occurrence, co-expression, databases, and text mining, which are also marked with different line colours: Green – neighbourhood; Red – gene fusion; Blue – co-occurrence; Black – coexpression; Pink – experiments; Turquoise – databases; Light green – text mining; Light blue – homology. Proteins with known structures are indicated with larger nodes. Disconnected nodes are removed. Discussed genes are written in large letters.

# Supplementary Figure S5

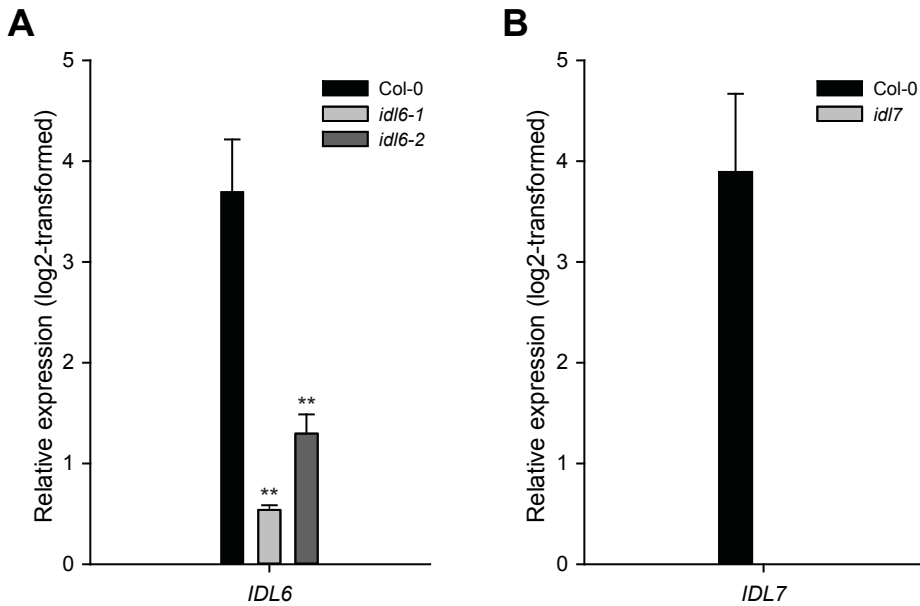

Supplementary Figure S5.

Verification of T-DNA insertion lines. T-DNA insertion lines for IDL6 and IDL7 were treated with 100 nM flg22 or a mock solution, and expression levels were analysed by qRT-PCR (n=3). No transcript was detected for the *idl7* mutant, while residual mRNA levels were detected in both *idl6-1* and *idl6-2* mutants. However, no increase in mRNA levels was detected upon flg22 treatment, indicating loss-of-function mutants for *IDL6*. Statistical differences (Rest analysis: \*, p value<0.05; \*\*, p value<0.01) between treated samples and control are indicated. Error bars indicate standard deviations.

# Supplementary Figure S6

## A

| <i>ZAT10</i>       |       |               |               |             |                    | <i>WRKY40</i>      |       |               |               |             |                    |
|--------------------|-------|---------------|---------------|-------------|--------------------|--------------------|-------|---------------|---------------|-------------|--------------------|
|                    | Col-0 | <i>idl6-1</i> | <i>idl6-2</i> | <i>idl7</i> | <i>idl6-2 idl7</i> |                    | Col-0 | <i>idl6-1</i> | <i>idl6-2</i> | <i>idl7</i> | <i>idl6-2 idl7</i> |
| Col-0              | 1     |               |               |             |                    | Col-0              | 1     |               |               |             |                    |
| <i>idl6-1</i>      | 0.88  | 1             |               |             |                    | <i>idl6-1</i>      | 0.92  | 1             |               |             |                    |
| <i>idl6-2</i>      | 1.24  | 1.41          | 1             |             |                    | <i>idl6-2</i>      | 1.38  | 1.50          | 1             |             |                    |
| <i>idl7</i>        | 0.92  | 1.04          | 0.74          | 1           |                    | <i>idl7</i>        | 0.82  | 0.89          | 0.59          | 1           |                    |
| <i>idl6-2 idl7</i> | 1.01  | 1.15          | 0.81          | 1.10        | 1                  | <i>idl6-2 idl7</i> | 1.05  | 1.15          | 0.76          | 1.29        | 1                  |

## B

| <i>ZAT10</i>       |       |               |               |             |                    | <i>WRKY40</i>      |       |               |               |             |                    |
|--------------------|-------|---------------|---------------|-------------|--------------------|--------------------|-------|---------------|---------------|-------------|--------------------|
|                    | Col-0 | <i>idl6-1</i> | <i>idl6-2</i> | <i>idl7</i> | <i>idl6-2 idl7</i> |                    | Col-0 | <i>idl6-1</i> | <i>idl6-2</i> | <i>idl7</i> | <i>idl6-2 idl7</i> |
| Col-0              | 1     |               |               |             |                    | Col-0              | 1     |               |               |             |                    |
| <i>idl6-1</i>      | 1.39  | 1             |               |             |                    | <i>idl6-1</i>      | 1.12  | 1             |               |             |                    |
| <i>idl6-2</i>      | 1.54* | 1.11          | 1             |             |                    | <i>idl6-2</i>      | 1.32  | 1.18          | 1             |             |                    |
| <i>idl7</i>        | 1.45  | 1.03          | 0.94          | 1           |                    | <i>idl7</i>        | 1.06  | 0.94          | 0.80          | 1           |                    |
| <i>idl6-2 idl7</i> | 1.47  | 1.05          | 0.95          | 1.02        | 1                  | <i>idl6-2 idl7</i> | 1.35  | 1.20          | 1.02          | 1.27        | 1                  |

Supplementary Figure S6.

Expression of IDL7-responsive genes in *idl6* and *idl7* mutant backgrounds. The expression of *ZAT10* and *WRKY40* after flg22 treatment were analysed in the *idl6* and *idl7* mutant lines by qRT-PCR. One-way ANOVA were used to compare the expression of the genes in all lines after A) control treatment and B) flg22 (100 nM) treatment, n=4. The values shows the relative expression of *ZAT10* or *WRKY40* between the different lines, as indicated by the matrix. Asterisks indicate significant differences ( $p > 0.05$ ).

# Supplementary Figure S7

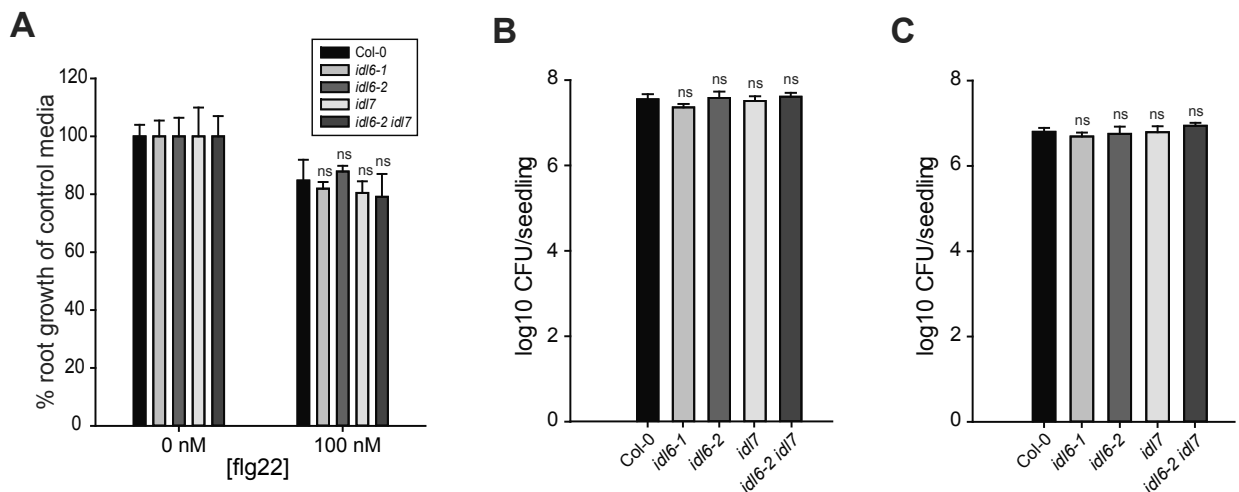

Supplementary Figure S7.

Growth arrest phenotype and susceptibility of *idl6* and *idl7* mutants to the phytopathogen *Pseudomonas syringae*. (A) Root lengths of wild-type and *idl6* and *idl7* loss-of-function mutants and wild-type were measured after growth on agar plates without or with Flg22 (100 nM) for ten days. n=48. (B) Pathogen susceptibility were investigated by infecting seven-day old seedlings of loss-of-function lines and wild-type grown in liquid half-strength MS media with  $\approx 1.25 \times 10^5$  CFU/ml *P. syringae* DC3000 (B), and *P. syringae* AvrRPM1 (C). Bacterial growth was determined by counting cell forming units (CFU) after extraction and plating on agar plates three days after infection (n=3, 3 seedlings per replica). Statistical differences for all experiments (Student's t-test: ns indicates p-value > 0.05) between the wild-type Col-0 and mutants are indicated. Error bars indicate standard deviations.

# Supplementary Figure S8

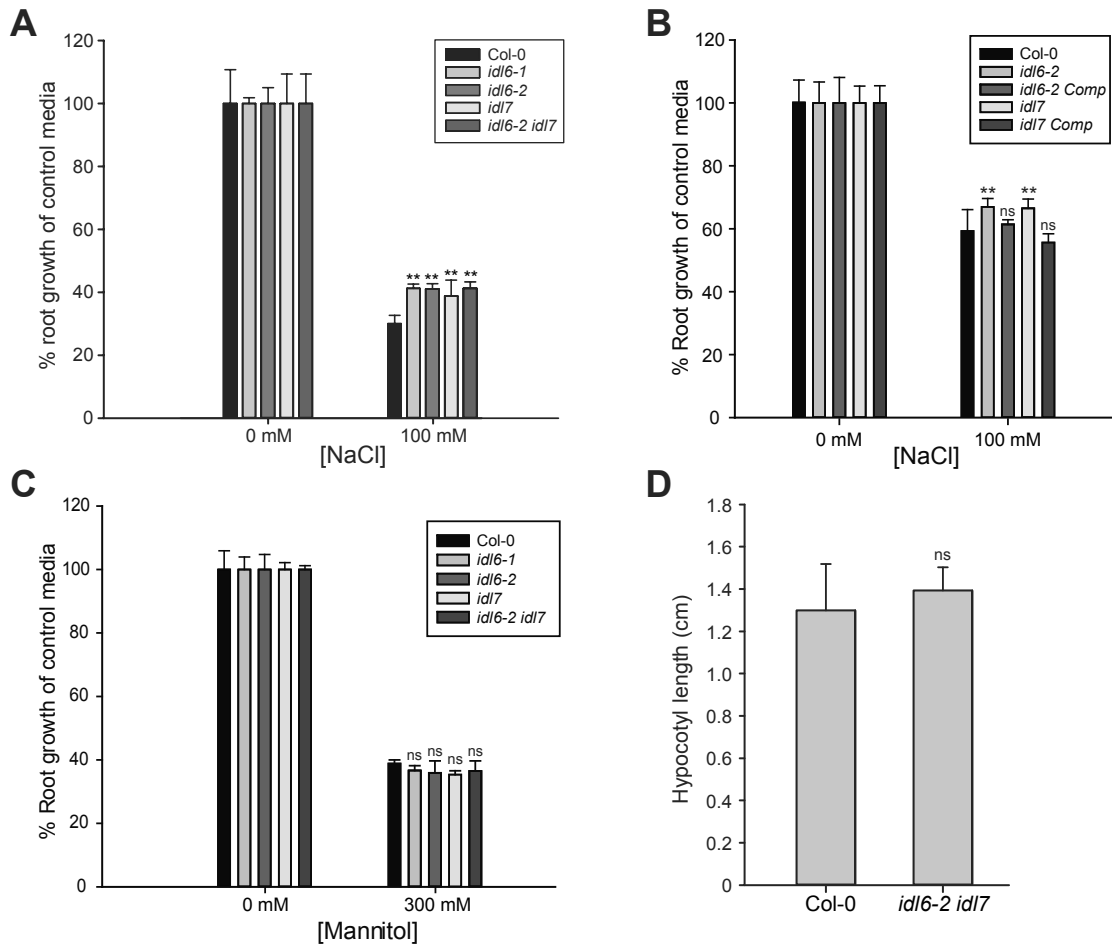

Supplementary Figure S8.

Growth arrest phenotype of *IDL6* and *IDL7* mutants. (A) Root lengths of wild-type and loss-of-function mutants and wild-type were measured after growth on half-strength MS medium without NaCl (0 mM) or with NaCl (100 mM) for one week (n=48). (B) The observed phenotypes of the loss-of-function mutants were verified by complementation. Root lengths of loss-of-function lines, complementation lines and wild-type were measured and compared after growth on half-strength MS without NaCl (0 mM NaCl) and with NaCl (100 mM NaCl) after one week growth. n=48. (C) Root lengths of loss-of-function mutants, plants over-expressing *IDL6* and *IDL7* and wild-type were measured after growth on half-strength MS medium without mannitol (0 mM mannitol) or with (300 mM mannitol) for one week (n=48). (D) Hypocotyl lengths of loss-of-function lines, overexpression lines and wild-type were measured after one week growth in the dark. n=36. Statistical differences for all experiments (Student's t-test: \*, p-value<0.05, \*\* p-value<0.01, ns indicates p-value>0.05) are indicated. Error bars indicate standard deviations.



# Supplementary Figure S9

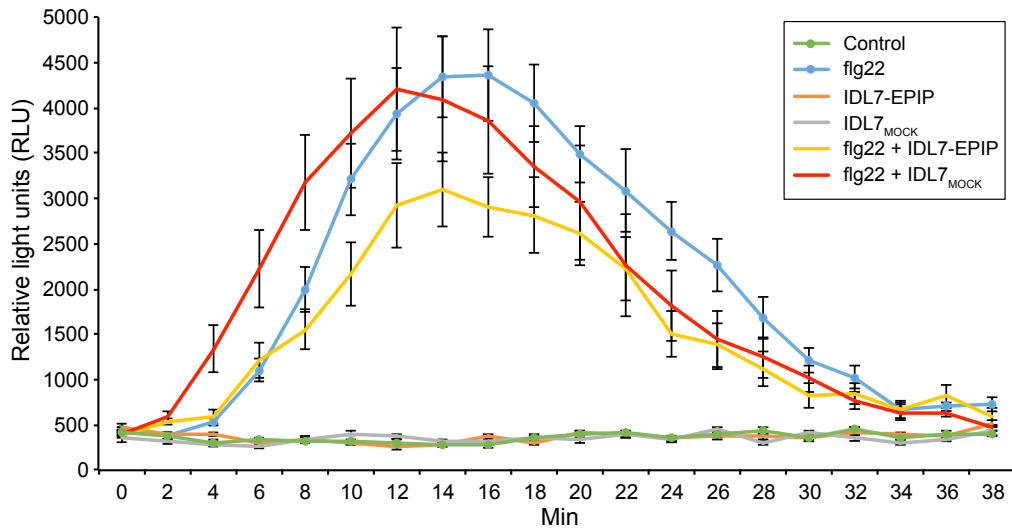

Supplementary Figure S9.

Modulation of flg22-induced oxidative burst by IDL7 peptide. Arabidopsis Col-0 wild-type leaf disks were exposed to flg22, IDL7 or MOCK<sub>IDL7</sub> peptides (100 nM), either alone or in combination (flg22 + IDL7 and flg22 + MOCK<sub>IDL7</sub>). Water was added as a control. ROS production measured as luminescence was monitored over time as relative light units (RLU). Error bars indicate SE of n = 12 replicates. The experiment was repeated three times with similar results.

**Supplementary Table S1. List of primers used in this study.**

| Primer name    | Sequence                                            | Used for                           |
|----------------|-----------------------------------------------------|------------------------------------|
| qCyp71A13F     | TAAAGAGGTGCTTCGGTTGC                                | qRT-PCR, negative RT-control       |
| qCyp71A13R     | TATCGCAGTGCTCGTTGGA                                 | qRT-PCR, negative RT-control       |
| qIDL6F         | TGCTTCGTTCTCAACAGCTAGG                              | qRT-PCR                            |
| qIDL6R         | GAATATCCAGCCGTC AAGT GAT                            | qRT-PCR                            |
| qIDL7F         | CCGGAGAGTTTGTTC CAGT CAT                            | qRT-PCR                            |
| qIDL7R         | CGTTAGTTTTCTTGCTGGGTCC                              | qRT-PCR                            |
| qGUSF          |                                                     | qRT-PCR                            |
| qGUSR          |                                                     | qRT-PCR                            |
| qTIP41-likeF   | GTGAAAAGTGTGGAGAGAAGCAA                             | qRT-PCR reference gene             |
| qTIP41-likeR   | TCAACTGGATACCCTTTCGCA                               | qRT-PCR reference gene             |
| qWRKY33F1      | GACATTCTTGACGACGGTTACA                              | qRT-PCR                            |
| qWRKY33R1      | CGATGGTTGTGCACTTGTAGTA                              | qRT-PCR                            |
| qWRKY40F1      | CTGACACTACCCTCGTTGTGAA                              | qRT-PCR                            |
| qWRKY40R1      | ACAGCTTGGAGCACAAGCACAT                              | qRT-PCR                            |
| qZAT12F        | AAGCAGTTTCATTGTTCCAAG                               | qRT-PCR                            |
| qZAT12R        | TTCTTCATCAATCCAGACGACA                              | qRT-PCR                            |
| qZAT10F        | GGAGGAGATGATCATCAACCT                               | qRT-PCR                            |
| qZAT10R        | CTTGTTACAGATGGTGCAACG                               | qRT-PCR                            |
| piDL6attB1     | GGGGACACGTTTGTACAAAAAGCAGGCTTCTTGGTACCCTCAAGCT      | Promoter and complementation lines |
| piDL6attB2     | GGGGACCACTTTGTACAAGAAAGCTGGGTCAGCTCCAATTCTAGCCAT    | Promoter lines                     |
| piDL7attB1     | GGGGACACGTTTGTACAAAAAGCAGGCTTCTAAAGTGATGGCACGACTT   | Promoter and complementation lines |
| piDL7attB2     | GGGGACCACTTTGTACAAGAAAGCTGGGTCGTTAATCGCCATCTGTAA    | Promoter lines                     |
| IDL6komp attB2 | GGGGACCACTTTGTACAAGAAAGCTGGGTCATTTTAATTTAGTAGTAAC   | Complementation lines              |
| IDL7komp attB2 | GGGGACCACTTTGTACAAGAAAGCTGGGTAATTC AATGGTATCCTTGACT | Complementation lines              |
| IDL7DSPattB1   | GGGGACAAGTTTGTACAAAAAGCAGGCTTCAGGATCTTACCCGGAGAG    | GFP lines                          |
| IDL7USattR     | GGGGACCACTTTGTACAAGAAAGCTGGGTAAGTCTTGACGTCGTTAGT    | GFP lines                          |
| SPIDL7attB1    | GGGGACAAGTTTGTACAAAAAGCAGGCTTCACCCACTTCATCATTTTACA  | GFP lines                          |
| IDL7EPIPattB2  | GGGGACCACTTTGTACAAGAAAGCTGGGTCGTTAGTTTTCTTGCTGGGTCC | GFP lines                          |
| IDL6-cdsFWD    | GGGGACAAGTTTGTACAAAAAGCAGGCTTTATGGCTAGAATTGGAGCT    | Over-expression lines              |
| IDL6-cdsREV    | GGGGACCACTTTGTACAAGAAAGCTGGGTCCTAAGTCTTGACGTCGTT    | Over-expression lines              |
| IDL7attF       | GGGGACAAGTTTGTACAAAAAGCAGGCTTGATGGCGATTAACAGATCT    | Over-expression lines              |
| IDL7attMSR     | GGGGACCACTTTGTACAAGAAAGCTGGGTCCTAAGTCTTGACGTCGTTAG  | Over-expression lines              |

---

|            |                              |                                                                   |
|------------|------------------------------|-------------------------------------------------------------------|
| IDL6KO123F | TGGTCTTTTCAGATAGGTGTGT       | Verification of IDL6 T-DNA insertion line, gene specific          |
| KO_209     | AATCAAAGCTCCAATTCTAGCC       | Verification of IDL6 T-DNA insertion line, gene specific          |
| IDL7KO1F   | CGTTAGTTTTCTTGCTGGGTCC       | Verification of IDL7 T-DNA insertion line, gene specific, qRT-PCR |
| KO_210     | CCGGAGAGTTTGTCCAGTCAT        | Verification of IDL7 T-DNA insertion line, gene specific, qRT-PCR |
| LBN        | CGGAACCACCATCAAACAGGAT       | Verification of T-DNA insert SALK lines, T-DNA specific           |
| p745       | AACGTCCGCAATGTGTTATTAAGTTGTC | Verification of T-DNA insert Wisconsin lines, T-DNA specific      |

---
